# Supplementary material for: Enantioselective Monitoring of Biodegradation of Ketamine and Its Metabolite Norketamine by Liquid Chromatography
Source: MDPI journal article supplement (doi:10.3390/chemosensors9090242), 2021-08-30
Supplement: s1 [file s1]

## SUPPLEMENTARY MATERIAL

### **Enantioselective monitoring of biodegradation of Ketamine and its metabolite norketamine by liquid chromatography**

Ariana Pérez-Pereira<sup>1,2</sup>, Alexandra S. Maia<sup>1,2</sup>, Virgínia Gonçalves<sup>1,2</sup>, Cláudia Ribeiro<sup>1,2,3</sup>, Maria Elizabeth Tiritan<sup>1,3,4\*</sup>

<sup>1</sup>CESPU, Instituto de Investigação e Formação Avançada em Ciências e Tecnologias da Saúde, Rua Central de Gandra, 1317, 4585-116 Gandra PRD, Portugal.

<sup>2</sup>TOXRUN – Toxicology Research Unit, University Institute of Health Sciences, CESPU, CRL, 4585-116 Gandra, Portugal.

<sup>3</sup>Interdisciplinary Center of Marine and Environmental Research (CIIMAR), University of Porto, Edifício do Terminal de Cruzeiros do Porto de Leixões, Av. General Norton de Matos s/n, 4050-208 Matosinhos, Portugal.

<sup>4</sup>Laboratório de Química Orgânica e Farmacêutica, Departamento de Ciências Químicas, Faculdade de Farmácia da Universidade do Porto, Rua Jorge de Viterbo Ferreira 228, 4050-313 Porto, Portugal.

#### **\*Corresponding author**

Maria Elizabeth Tiritan (✉)

CESPU, Instituto de Investigação e Formação Avançada em Ciências e Tecnologias da Saúde,  
Rua Central de Gandra, 1317, 4585-116 Gandra PRD, Portugal

E-mail: elizabeth.tiritan@iucs.cespu.pt

**Table S1.** Experimental conditions of biodegradation assay of K racemate in AS.

| Conditions                             | Illumination |
|----------------------------------------|--------------|
| (R,S)-K 40 µg/mL + AS + Sodium Acetate | Dark         |
|                                        | Light        |
| (R,S)-K 40 µg/mL + AS                  | Dark         |
|                                        | Light        |
| AS + Sodium Acetate (Growth Control)   | Dark         |
|                                        | Light        |
| Abiotic (R,S)-K 40 µg/mL (Without AS)  | Dark         |
|                                        | Light        |
| Dead cells + (R,S)-K 40 µg/mL          | Dark         |
|                                        | Light        |
